# Supplementary material for: Inhaled Nitric Oxide in Preterm Infants — Correction
Source: Atypon-hosted journal article supplement (doi:10.1056/nejmc076350), 2007-10-03
Supplement: nejm_ballard_1444sa1.pdf [file nejm_ballard_1444sa1.pdf]

## Supplementary Appendix

This appendix has been provided by the authors to show revised versions of Tables 1–5.

Supplement to: Ballard RA. Inhaled nitric oxide in preterm infants — correction. *N Engl J Med* 2007;357:1444-5.

**Table 1:** Row 1, Column 4, previous value was 0.45 and has been changed to 0.53  
 Row 2, Column 4, previous value was 0.60 and has been changed to 0.79  
 Row 4, Column 4, previous value was 0.38 and has been changed to 0.45  
 Row 5, Column 4, previous value was 0.37 and has been changed to 0.46  
 Row 6, Column 4, previous value was 0.22 and has been changed to 0.25  
 Row 11, Column 4, previous value was 0.23 and has been changed to 0.27  
 Row 12, Column 4, previous value was 0.25 and has been changed to 0.32  
 Row 13, Column 4, previous value was 0.58 and has been changed to 0.64  
 Row 15, Column 4, previous value was 0.68 and has been changed to 0.77  
 Row 16, Column 4, previous value was 0.71 and has been changed to 0.75  
 Row 17, Column 4, previous value was 0.60 and has been changed to 0.62  
 Row 22, Column 4, previous value was 0.76 and has been changed to 0.91  
 Row 23, Column 4, previous value was 0.84 and has been changed to 0.92  
 Row 24, Column 4, previous value was 0.83 and has been changed to 1.00  
 Row 25, Column 4, previous value was 0.36 and has been changed to 0.38  
 Row 26, Column 4, previous value was 0.13 and has been changed to 0.17

**Table 1. Baseline Characteristics of the Infants \***

| <b>Characteristics</b>                               | <b>Inhaled<br/>Nitric Oxide<br/>(N=294)</b> | <b>Placebo<br/>(N=288)</b> | <b>P value</b> |
|------------------------------------------------------|---------------------------------------------|----------------------------|----------------|
| Birth Weight                                         |                                             |                            |                |
| Mean - g                                             | 766±161                                     | 759±155                    | 0.53           |
| 500-799 – no. (%)                                    | 197(67.0)                                   | 197(68.4)                  | 0.79           |
| 800-1250 – no. (%)                                   | 97(33.0)                                    | 91(31.6)                   |                |
| Gestational Age – wk                                 | 26±1.5                                      | 26±1.5                     | 0.45           |
| Male Sex – no. (%)                                   | 155(52.7)                                   | 162(56.2)                  | 0.46           |
| Mother's race or ethnic group <sup>†</sup> – no. (%) |                                             |                            | 0.25           |
| White                                                | 170(57.8)                                   | 145(50.3)                  |                |
| Black                                                | 76(25.9)                                    | 90(31.3)                   |                |
| Hispanic                                             | 32(10.9)                                    | 43(14.9)                   |                |
| Other                                                | 16(5.4)                                     | 10(3.5)                    |                |
| Antenatal corticosteroids – no. (%)                  | 243(82.7)                                   | 229(79.5)                  | 0.27           |
| Surfactant – no. (%)                                 | 288(98.0)                                   | 277(96.2)                  | 0.32           |
| Vitamin A – no. (%)                                  | 154(52.4)                                   | 160(55.6)                  | 0.64           |
| Age at entry                                         |                                             |                            |                |
| Median (interquartile range) - days                  | 16(12, 19)                                  | 16(13, 19)                 | 0.77           |
| Age 7-14 days at entry – no. (%)                     | 112(38.1)                                   | 115(39.9)                  | 0.75           |
| Respiratory severity score at entry <sup>‡</sup>     |                                             |                            |                |
| <3.5 – no. (%)                                       | 162(55.1)                                   | 149(51.7)                  | 0.62           |

| <b>Characteristics</b>                             | <b>Inhaled<br/>Nitric Oxide<br/>(N=294)</b> | <b>Placebo<br/>(N=288)</b> | <b>P value</b> |
|----------------------------------------------------|---------------------------------------------|----------------------------|----------------|
| 3.5 – <10 – no. (%)                                | 120(40.8)                                   | 126(43.8)                  |                |
| ≥10 – no. (%)                                      | 12(4.1)                                     | 13(4.5)                    |                |
| Clinical complications – no. (%)                   |                                             |                            |                |
| Pneumothorax or Pneumomediastinum                  | 34(11.6)                                    | 32(11.1)                   | 0.91           |
| Patent ductus arteriosus – no. (%)                 | 192(65.3)                                   | 194(67.4)                  | 0.92           |
| Necrotizing enterocolitis – no. (%)                | 12(4.1)                                     | 11(3.8)                    | 1.00           |
| Sepsis – no. (%)                                   | 70(23.8)                                    | 58(20.1)                   | 0.38           |
| Grade 3 or 4 intraventricular hemorrhage – no. (%) | 35(11.9)                                    | 45(15.6)                   | 0.17           |
| Type of ventilation                                |                                             |                            | 0.66           |
| Conventional – no. (%)                             | 202(68.7)                                   | 191(66.3)                  |                |
| High Frequency – no. (%)                           | 65(22.1)                                    | 74(25.7)                   |                |
| Nasal CPAP – no. (%)                               | 27(9.2)                                     | 23(8.0)                    |                |

Table 2: Row 1, Column 4, previous value was 0.04 and has been changed to 0.03  
 Row 1, Column 5, previous value was 1.23 (1.01-1.51) and has been changed to 1.26 (1.02-1.55)  
 Row 2, Column 3, previous value was 106/288 (36.8) and has been changed to 105/288 (36.5)  
 Row 3, Column 3, previous value was 182/288 (63.2) and has been changed to 183/288 (63.5)  
 Row 4, Column 3, previous value was 164/288 (56.9) and has been changed to 165/288 (57.3)  
 Row 6, Column 4, previous value was 0.14 and has been changed to 0.07  
 Row 6, Column 5, previous value was 1.20 (0.94-1.54) and has been changed to 1.26 (0.98-1.62)  
 Row 7, Column 3, previous value was 74/197 (37.6) and has been changed to 73/197 (37.1)  
 Row 8, Column 3, previous value was 123/197 (62.4) and has been changed to 124/197 (62.9)  
 Row 9, Column 3, previous value was 108/197 (54.8) and has been changed to 109/197 (55.3)  
 Row 10, Column 5, previous value was 1.01 (0.96-1.07) and has been changed to 1.02 (0.96-1.08)  
 Row 11, Column 4, previous value was 0.14 and has been changed to 0.21  
 Row 11, Column 5, previous value was 1.30 (0.91-1.87) and has been changed to 1.25 (0.88-1.79)

**Table 2. Incidence of Primary Outcome**

| Outcome                                     | Inhaled Nitric Oxide | Placebo       | P Value | Relative Benefit (95% CI) |
|---------------------------------------------|----------------------|---------------|---------|---------------------------|
| <b>Overall population</b>                   |                      |               |         |                           |
| Survival without chronic lung disease       | 129/294(43.9)        | 105/288(36.5) | 0.03    | 1.26(1.02- 1.55)          |
| Death or survival with chronic lung disease | 165/294(56.1)        | 183/288(63.5) |         |                           |
| Chronic lung disease                        | 149/294(50.7)        | 165/288(57.3) |         |                           |
| Death                                       | 16/294( 5.4)         | 18/288( 6.3)  |         |                           |
| <b>Birth weight of 500-799 g</b>            |                      |               |         |                           |
| Survival without chronic lung disease       | 85/197(43.1)         | 73/197(37.1)  | 0.07    | 1.26(0.98- 1.62)          |
| Death or survival with chronic lung disease | 112/197(56.9)        | 124/197(62.9) |         |                           |
| Chronic lung disease                        | 99/197(50.3)         | 109/197(55.3) |         |                           |
| Death                                       | 13/197( 6.6)         | 15/197( 7.6)  |         | 1.02(0.96- 1.08)          |
| <b>Birth weight of 800-1250 g</b>           |                      |               |         |                           |
| Survival without chronic lung disease       | 44/ 97(45.4)         | 32/ 91(35.2)  | 0.21    | 1.25(0.88- 1.79)          |
| Death or survival with chronic lung disease | 53/ 97(54.6)         | 59/ 91(64.8)  |         |                           |
| Chronic lung disease                        | 50/ 97(51.5)         | 56/ 91(61.5)  |         |                           |
| Death                                       | 3/ 97( 3.1)          | 3/ 91( 3.3)   |         | 1.00(0.95- 1.06)          |

Table 3: Row 1, Column 8, previous value was 0.01 and has been changed to 0.008

**Table 3. Outcome According to the Severity of Disease at 40 and 44 Weeks of Postmenstrual Age**

|                                             | 500-799 g               |                    | 800-1250 g             |                   | All Infants             |                    | P value |
|---------------------------------------------|-------------------------|--------------------|------------------------|-------------------|-------------------------|--------------------|---------|
|                                             | Nitric Oxide<br>(N=197) | Placebo<br>(N=197) | Nitric Oxide<br>(N=97) | Placebo<br>(N=91) | Nitric Oxide<br>(N=294) | Placebo<br>(N=288) |         |
| <b>Severity of Disease at 40 wk</b>         |                         |                    |                        |                   |                         |                    | 0.01    |
| Discharged                                  | 82(41.6)                | 60(30.5)           | 43(44.3)               | 38(41.8)          | 125(42.5)               | 98(34.0)           |         |
| Hospitalization without support             | 45(22.8)                | 44(22.3)           | 21(21.6)               | 12(13.2)          | 66(22.4)                | 56(19.4)           |         |
| Hospitalization with oxygen only            | 40(20.3)                | 55(27.9)           | 26(26.8)               | 29(31.9)          | 66(22.4)                | 84(29.2)           |         |
| Hospitalization with mechanical ventilation | 15( 7.6)                | 21(10.7)           | 3( 3.1)                | 9( 9.9)           | 18( 6.1)                | 30(10.4)           |         |
| Death                                       | 15( 7.6)                | 16( 8.1)           | 4( 4.1)                | 3( 3.3)           | 19( 6.5)                | 19( 6.6)           | 0.03    |
| Unknown                                     | 0                       | 1( 0.5)            | 0                      | 0                 | 0                       | 1( 0.3)            |         |
| <b>Severity of Disease at 44 wk</b>         |                         |                    |                        |                   |                         |                    |         |
| Discharged                                  | 151(76.6)               | 129(65.5)          | 82(84.5)               | 70(76.9)          | 233(79.3)               | 199(69.1)          |         |
| Hospitalization without support             | 6( 3.0)                 | 15( 7.6)           | 2( 2.1)                | 4( 4.4)           | 8( 2.7)                 | 19( 6.6)           |         |
| Hospitalization with oxygen only            | 19( 9.6)                | 26(13.2)           | 8( 8.2)                | 9( 9.9)           | 27( 9.2)                | 35(12.2)           |         |
| Hospitalization with mechanical ventilation | 5( 2.5)                 | 8( 4.1)            | 1( 1.0)                | 4( 4.4)           | 6( 2.0)                 | 12( 4.2)           |         |
| Death                                       | 16( 8.1)                | 16( 8.1)           | 4( 4.1)                | 4( 4.4)           | 20( 6.8)                | 20( 6.9)           |         |
| Unknown                                     | 0                       | 3( 1.5)            | 0                      | 0                 | 0                       | 3( 1.0)            |         |

Table 4: Row 1, Column 5, previous value was 0.91 and has been changed to 0.94  
 Row 2, Column 5, previous value was 0.63 and has been changed to 0.65  
 Row 3, Column 5, previous value was 0.84 and has been changed to 0.85  
 Row 4, Column 5, previous value was 0.85 and has been changed to 0.90  
 Row 5, Column 5, previous value was 1.00 and has been changed to 0.95  
 Row 6, Column 5, previous value was 0.95 and has been changed to 0.92  
 Row 7, Column 5, previous value was 0.67 and has been changed to 0.57

**Table 4. Incidence of Clinical Complications after Study Entry**

|                                         | <b>Inhaled Nitric Oxide<br/>(N=294)</b> | <b>Placebo<br/>(N=288)</b> | <b>Relative Risk<br/>(95% CI)</b> | <b>P Value</b> |
|-----------------------------------------|-----------------------------------------|----------------------------|-----------------------------------|----------------|
| Sepsis                                  | 121(41.2)                               | 118(41.0)                  | 0.99(0.81,1.22)                   | 0.94           |
| Necrotizing enterocolitis               | 23(7.8)                                 | 19(6.6)                    | 1.16(0.64,2.11)                   | 0.65           |
| Necrotizing enterocolitis with surgery  | 10(3.4)                                 | 8(2.8)                     | 1.19(0.46,3.11)                   | 0.85           |
| Patent ductus arteriosus treated        | 54(18.4)                                | 55(19.1)                   | 0.96(0.68,1.37)                   | 0.90           |
| Retinopathy of prematurity              | 246(83.7)                               | 236(81.9)                  | 1.00(0.93,1.07)                   | 0.95           |
| Retinopathy of prematurity with surgery | 72(24.5)                                | 68(23.6)                   | 0.99(0.73,1.34)                   | 0.92           |
| Neurological evolution*                 | 13(5.1)                                 | 10(4.1)                    | 1.29(0.56,2.99)                   | 0.57           |

**Table 5:** Row 1, Column 5, previous value was 0.006 and has been changed to 0.005  
 Row 2, Column 4, previous value was 1.81 (1.27-2.59) and has been changed to 1.91 (1.31-2.78)  
 Row 3, Column 3, previous value was 32/115 (27.8) and has been changed to 31/115 (27.0)  
 Row 8, Column 5, previous value was 0.20 and has been changed to 0.32  
 Row 9, Column 4, previous value was 1.26 (1.00-1.58) and has been changed to 1.28 (1.02-1.61)  
 Row 10, Column 3, previous value was 69/149 (46.3) and has been changed to 68/149 (45.6)  
 Row 12, Column 4, previous value was 1.10 (0.74-1.64) and has been changed to 1.11 (0.74-1.66)  
 Row 15, Column 5, previous value was 0.05 and has been changed to 0.06  
 Row 17, Column 4, previous value was 1.04 (0.76-1.43) and has been changed to 1.06 (0.76-1.47)  
 Row 18, Column 3, previous value was 32/90 (35.6) and has been changed to 31/90 (34.4)  
 Row 18, Column 4, previous value was 1.66 (1.16-2.37) and has been changed to 1.72 (1.20-2.47)  
 Row 19, Column 4, previous value was 1.62 (1.04-2.53) and has been changed to 1.66 (1.06-2.59)  
 Row 20, Column 4, previous value was 0.57 (0.27-1.20) and has been changed to 0.54 (0.25-1.14)  
 Row 22, Column 4, previous value was 1.37 (0.81-2.32) and has been changed to 1.50 (0.85-2.65)  
 Row 23, Column 3, previous value was 16/63 (25.4) and has been changed to 15/63 (23.8)  
 Row 23, Column 4, previous value was 2.32 (1.43-3.77) and has been changed to 2.50 (1.53-4.11)  
 Row 29, Column 3, previous value was 41/82 (50.0) and has been changed to 40/82 (48.8)  
 Row 29, Column 4, previous value was 1.37 (1.05-1.80) and has been changed to 1.38 (1.06-1.81)  
 Row 31, Column 4, previous value was 0.88 (0.52-1.50) and has been changed to 0.92 (0.54-1.57)  
 Row 32, Column 4, previous value was 1.52 (0.84-2.76) and has been changed to 1.49 (0.81-2.67)

**Table 5. Post Hoc Subgroup Analysis of Survival without Chronic Lung Disease at 36 Weeks of Postmenstrual Age**

|                                              | <b>Inhaled Nitric Oxide (N=294)</b> | <b>Placebo (N=288)</b> | <b>Relative Benefit<br/>(95% CI)</b> | <b>P Value</b> |
|----------------------------------------------|-------------------------------------|------------------------|--------------------------------------|----------------|
| <b>Age at Entry</b>                          |                                     |                        |                                      | 0.005          |
| 7-14 days                                    |                                     |                        | 1.91(1.31- 2.78)                     |                |
| Survival without chronic lung disease        | 55/112(49.1)                        | 31/115(27.0)           |                                      |                |
| Death                                        | 12/112(10.7)                        | 13/115(11.3)           |                                      |                |
| <b>15-21 days</b>                            |                                     |                        | 0.99(0.77- 1.28)                     |                |
| Survival without chronic lung disease        | 74/182(40.7)                        | 74/173(42.8)           |                                      |                |
| Death                                        | 12/182( 6.6)                        | 10/173( 5.8)           |                                      |                |
| <b>Severity score at entry</b>               |                                     |                        |                                      | 0.32           |
| <3.5                                         |                                     |                        | 1.28(1.02- 1.61)                     |                |
| Survival without chronic lung disease        | 92/162(56.8)                        | 68/149(45.6)           |                                      |                |
| Death                                        | 9/162( 5.6)                         | 9/149( 6.0)            |                                      |                |
| ≥3.5                                         |                                     |                        | 1.11(0.74- 1.66)                     |                |
| Survival without chronic lung disease        | 37/132(28.0)                        | 37/139(26.6)           |                                      |                |
| Death                                        | 15/132(11.4)                        | 14/139(10.1)           |                                      |                |
| <b>Survival without chronic lung disease</b> |                                     |                        |                                      | 0.06           |
| <b>Race or ethnic group</b>                  |                                     |                        |                                      |                |
| White                                        | 59/170(34.7)                        | 50/145(34.5)           | 1.06(0.76- 1.47)                     |                |
| Black                                        | 43/ 76(56.6)                        | 31/ 90(34.4)           | 1.72(1.20- 2.47)                     |                |
| Hispanic                                     | 21/ 32(65.6)                        | 17/ 43(39.5)           | 1.66(1.06- 2.59)                     |                |
| Other                                        | 6/ 16(37.5)                         | 7/ 10(70.0)            | 0.54(0.25, 1.14)                     |                |

|                              | <b>Inhaled Nitric Oxide (N=294)</b> | <b>Placebo (N=288)</b> | <b>Relative Benefit<br/>(95% CI)</b> | <b>P Value</b> |
|------------------------------|-------------------------------------|------------------------|--------------------------------------|----------------|
| <b>Age at Entry</b>          |                                     |                        |                                      | 0.005          |
| 7-14 days                    |                                     |                        | 1.91(1.31- 2.78)                     |                |
| Age of 7-14 days at entry    |                                     |                        |                                      |                |
| White                        | 24/ 60(40.0)                        | 16/ 52(30.8)           | 1.50(0.85- 2.65)                     |                |
| Non-White                    | 31/ 52(59.6)                        | 15/ 63(23.8)           | 2.50(1.53- 4.11)                     |                |
| Age of 15-21 days at entry   |                                     |                        |                                      |                |
| White                        | 35/110(31.8)                        | 34/ 93(36.6)           | 0.89(0.60- 1.34)                     |                |
| Non-White                    | 39/ 72(54.2)                        | 40/ 80(50.0)           | 1.13(0.83- 1.55)                     |                |
| Severity score <3.5 at entry |                                     |                        |                                      |                |
| White                        | 38/ 82(46.3)                        | 28/ 67(41.8)           | 1.14(0.78- 1.66)                     |                |
| Non-White                    | 54/ 80(67.5)                        | 40/ 82(48.8)           | 1.38(1.06- 1.81)                     |                |
| Severity score ≥3.5 at entry |                                     |                        |                                      |                |
| White                        | 21/ 88(23.9)                        | 22/ 78(28.2)           | 0.92(0.54- 1.57)                     |                |
| Non-White                    | 16/ 44(36.4)                        | 15/ 61(24.6)           | 1.47(0.81- 2.67)                     |                |
